# Supplementary material
Source: Elsevier journal article supplement (https://www.sciencedirect.com/science/article/pii/S0212656716301329)
Supplement: mmc1 [file S0212656716301329:mmc1.docx]

**MATERIAL SUPLEMENTARIO EN LA WEB**

**Anexo**

Porcentaje de respuesta para todos los ítems del *Health Literacy Survey-European*

*Union (HLS-EU)*

| **ÍTEM** | | **Muy difícil** | **Difícil** | **Fácil** | **Muy fácil** | **NA** |
| --- | --- | --- | --- | --- | --- | --- |
| **1.** | encontrar información sobre los síntomas asociados a las enfermedades que son de su interés | 123(38,80) | 95 (29,97) | 81 (25,56) | 18 (5,68) | 1 (0,32) |
| **2.** | encontrar información sobre los tratamientos asociados a las enfermedades que son de su interés | 123(38,80) | 91 (28,71) | 87 (27,44) | 16 (5,05) | 1 (0,32) |
| **3.** | averiguar qué hacer en caso de emergencia médica | 26 (8,25) | 56 (17,78) | 144(45,71) | 89(28,25) | 3 (0,95) |
| **4.** | averiguar dónde conseguir ayuda profesional cuando se encuentra enfermo (Instrucciones: por ejemplo un médico, farmacéutico o psicólogo) | 24 (7,57) | 43 (13,56) | 166(52,37) | 84(26,50) | 1 (0,32) |
| **5.** | entender lo que me dice el médico | 19 (5,97) | 67 (21,07) | 167(52,52) | 65(20,44) | - |
| **6.** | entender los prospectos que vienen con sus medicamentos | 91(28,8) | 99 (31,33) | 94 (29,75) | 32(10,13) | 2 (0,63) |
| **7.** | entender qué hacer en caso de emergencia médica | 22 (6,92) | 61 (19,18) | 158(49,69) | 77(24,21) | - |
| **8.** | entender las instrucciones del médico o farmacéutico sobre cómo tomar las medicinas recetadas | 20 (6,31) | 41 (12,94) | 183(57,73) | 73(23,03) | 1 (0,32) |
| **9.** | juzgar en qué medida la información proporcionada por el médico es aplicable a su situación | 70 (22,22) | 89 (28,25) | 133(42,22) | 23 (7,30) | 3 (0,95) |
| **10.** | juzgar las ventajas y desventajas de los distintos tratamientos posibles | 104(32,81) | 109(34,39) | 90 (28,39) | 14 (4,42) | 1 (0,32) |
| **11.** | valorar cuándo puede necesitar una segunda opinión de otro médico | 97 (31,8) | 94 (30,82) | 100(32,79) | 14 (4,59) | 13(4,26) |
| **12.** | juzgar si la información que aparece en los medios de comunicación sobre una enfermedad es fiable (Instrucciones: TV, Internet u otros medios de información) | 84 (26,75) | 101(32,17) | 11 (35,35) | 18 (5,73) | 4 (1,27) |
| **13.** | utilizar la información proporcionada por el médico para tomar decisiones sobre su enfermedad | 43 (13,69) | 69 (21,97) | 161(51,27) | 41(13,06) | 4 (1,27) |
| **14.** | seguir las instrucciones recibidas con respecto a su medicación | 17 (5,35) | 32 (10,06) | 196(61,64) | 73(22,96) | - |
| **15.** | llamar a una ambulancia en caso de emergencia | 20 (6,31) | 42 (13,25) | 133(41,96) | 122(38,9) | 1 (0,32) |
| **16.** | seguir las instrucciones de su médico o farmacéutico | 15 (4,73) | 38 (11,99) | 189(59,62) | 75(23,66) | 1 (0,32) |
| **17.** | encontrar información para saber qué hacer con respecto a hábitos no saludables como fumar, hacer poco ejercicio físico o beber alcohol en exceso | 94 (29,65) | 75 (23,66) | 120(37,85) | 28 (8,83) | 1 (0,32) |
| **18.** | encontrar información sobre la manera de abordar problemas de salud mental como el estrés o la depresión | 126(40,26) | 93 (29,71) | 79 (25,24) | 15 (4,79) | 5 (1,60) |
| **19.** | encontrar información sobre las vacunas, pruebas de detección precoz de enfermedades y revisiones médicas que debería hacerse (Instrucciones: mamografía, prueba de nivel de azúcar en sangre y tensión arterial) | 94 (29,94) | 99 (31,53) | 109(34,71) | 12 (3,82) | 4 (1,27) |
| **20.** | encontrar información sobre cómo prevenir y abordar problemas de salud como el sobrepeso, hipertensión arterial o niveles de colesterol altos | 75 (23,73) | 86 (27,22) | 137(43,35) | 18 (5,70) | 2 (0,63) |
| **21.** | comprender las advertencias sanitarias relacionadas con hábitos como fumar, hacer poco ejercicio físico o beber alcohol en exceso | 28 (8,81) | 47 (14,78) | 181(56,92) | 62(19,50) | - |
| **22.** | entender por qué necesita vacunarse | 18 (5,68) | 33 (10,41) | 186(58,36) | 81(25,55) | 1 (0,32) |
| **23.** | comprender por qué necesita hacerse pruebas de detección precoz de enfermedades o chequeos médicos (Instrucciones: mamografía, prueba de nivel de azúcar en sangre y tensión arterial) | 42 (13,29) | 55 (17,41) | 165(52,22) | 54(17,09) | 2 (0,63) |
| **24.** | valorar la fiabilidad de las advertencias sanitarias relacionadas con hábitos como fumar, hacer poco ejercicio físico o beber alcohol en exceso | 42 (13,29) | 55 (17,41) | 165(52,22) | 54(17,09) | 2 (0,63) |
| **25.** | valorar cuándo necesita acudir al médico a hacerse una revisión médica | 23 (7,23) | 50 (15,72) | 182(57,23) | 63(19,81) | - |
| **26.** | valorar cuáles son las vacunas que puede necesitar | 57 (18,10) | 96(30,478) | 126 (40) | 36(11,43) | 3 (0,95) |
| **27.** | valorar cuáles son las pruebas de detección precoz de enfermedades y las revisiones médicas que debería realizarse (Instrucciones: mamografía, prueba de nivel de azúcar en sangre y tensión arterial) | 63 (19,94) | 113(35,76) | 117(37,03) | 23 (7,28) | 2 (0,63) |
| **28.** | valorar la fiabilidad de la información sobre riesgos para la salud que aparece en los medios de comunicación (Instrucciones: TV, Internet u otros medios de información) | 73 (23,86) | 114(37,25) | 96 (31,37) | 23 (7,52) | 12(3,92) |
| **29.** | decidir si debe ponerse la vacuna contra la gripe | 24 (7,62) | 23 (7,30) | 167(53,02) | 101(32,6) | 3 (0,95) |
| **30.** | decidir cómo protegerse de las enfermedades gracias a los consejos que le dan la familia y los amigos | 36 (11,43) | 48 (15,24) | 180(57,14) | 51(16,19) | 3 (0,95) |
| **31.** | decidir cómo protegerse de las enfermedades gracias a la información que proporcionan los medios de comunicación (Instrucciones: periódicos, folletos, Internet u otros medios de información) | 75 (23,73) | 109 (34,5) | 111(35,13) | 21 (6,65) | 2 (0,63) |
| **32.** | encontrar información sobre actividades saludables como el ejercicio físico y la alimentación saludable | 80 (25,64) | 82 (26,28) | 127(40,71) | 23 (7,37) | 6 (1,92) |
| **33.** | encontrar actividades que sean buenas para su bienestar mental (Instrucciones: meditación, ejercicio, paseos, Pilates, etc.) | 79 (26,60) | 101(34,00) | 94 (31,65) | 23 (7,74) | 21(7,07) |
| **34.** | encontrar información sobre cómo se podría promover y fomentar la salud de su barrio (Instrucciones: reducción de los niveles de contaminación y ruido, creación de espacios verdes, instalaciones recreativas) | 93 (36,61) | 99 (38,98) | 52 (20,47) | 10 (3,94) | 64(25,20) |
| **35.** | averiguar qué cambios a nivel político podrían afectar a su salud (Instrucciones: normativa, nuevos programas de chequeos médicos, cambios en el gobierno, reestructuración de los servicios sanitarios, etc.) | 83 (34,87) | 88 (36,97) | 61 (25,63) | 6 (2,52) | 80(33,61) |
| **36.** | averiguar qué medidas podrían mejorar su salud en el trabajo | 86 (40,95) | 54 (25,71) | 59 (28,10) | 11 (5,24) | 108(51,43) |
| **37.** | comprender los consejos sobre salud que dan la familia y los amigos | 20 (6,35) | 47 (14,92) | 197(62,54) | 51(16,19) | 3 (0,95) |
| **38.** | comprender la información incluida en los envases de alimentos | 82 (25,95) | 91 (28,8) | 113(35,76) | 30 (9,49) | 2 (0,63) |
| **39.** | comprender la información proporcionada por los medios de comunicación sobre cómo mejorar su salud (Instrucciones: Internet, periódicos, revistas) | 79 (24,92) | 89 (28,08) | 122(38,49) | 27 (8,52) | 1 (0,32) |
| **40.** | comprender la información sobre cómo mantenerse mentalmente sano | 79 (25,08) | 88 (27,94) | 125(39,68) | 23 (7,30) | 3 (0,95) |
| **41.** | valorar de qué manera el lugar en el que vive condiciona su salud y bienestar (Instrucciones: Su comunidad, su barrio) | 79 (25,49) | 79 (25,48) | 131(42,26) | 21 (6,77) | 8 (2,58) |
| **42.** | valorar de qué manera las condiciones de su vivienda pueden ayudarle a mantenerse sano | 47 (14,92) | 71 (22,54) | 161(51,11) | 36(11,43) | 3 (0,95) |
| **43.** | valorar cuáles de sus hábitos diarios afectan a su salud (Instrucciones: costumbres relacionadas con el consumo de alcohol, hábitos alimenticios, ejercicio, etc.) | 31 (9,75) | 44 (13,84) | 199(62,58) | 44(13,84) | - |
| **44.** | tomar decisiones para mejorar su salud | 28 (8,83) | 68 (21,45) | 180(56,78) | 41(12,93) | 1 (0,32) |
| **45.** | apuntarse a un club deportivo o gimnasio | 136(43,87) | 65 (20,97) | 82 (26,45) | 27 (8,71) | 8 (2,58) |
| **46.** | modificar su forma de vida en aquellos aspectos que afectan a su salud y bienestar (Instrucciones: costumbres relacionadas con el consumo de alcohol, hábitos alimenticios, ejercicio, etc.) | 46 (14,47) | 79 (24,84) | 156(49,06) | 37(11,64) | - |
| **47.** | involucrarse en actividades que mejoren la salud y el bienestar de su comunidad | 117(37,74) | 76 (24,52) | 97 (31,29) | 20 (6,45) | 8 (2,58) |
